# Supplementary material for: National cross-sectional survey of US adults to assess the reliability of current and lifetime cannabis smoking
Source: PubMed Central journal article supplement — BMJ Open. 2024 Aug 31;14(8):e078245. doi: 10.1136/bmjopen-2023-078245 (PMC11367356; doi:10.1136/bmjopen-2023-078245), 2024-08-31
Supplement: bmjopen-14-8-s001.pdf [file bmjopen-14-8-s001.pdf]

## **S1. RELIABILITY SURVEY**

**(Given to participants who indicated they smoked marijuana “Within the past 30 days” and “More than 30 days ago but within the past 12 months” from the Main Survey)**

**Survey Preface:** “Thank you for participating in this survey. We are going to ask about your marijuana use, as well as some questions about your general health. You may know marijuana by other names including cannabis, pot, weed, grass, and hash. This survey is being sponsored by researchers at the University of California, San Francisco. All of your answers will be reported anonymously and kept confidential.”

### **Marijuana Questions part 1**

1. How long has it been since you last used marijuana?
- Within the past 30 days
  - More than 30 days ago but within the past 12 months
  - More than 12 months ago

*If answer = Within the past 30 days, ask Q3*

*If answer = More than 30 days ago but within the past 12 months, ask Q2*

*If answer = More than 12 months ago, skip to Q14 (General Health Questions)*

2. In what form(s) have you used marijuana in the last year? (Check all that apply)
- Smoking
  - Vaping
  - Edibles
  - Dabbing concentrate (wax/shatter)
  - Topically

*If answer = Smoking, skip to Q10 (Lifetime Questions)*

*If answer = Vaping, Edibles, Dabbing concentrate (wax/shatter), or Topically, skip to Q14 (General Health Questions)*

3. In what form(s) have you used marijuana in the last 30 days? (Check all that apply)
- Smoking
  - Vaping
  - Edibles
  - Dabbing concentrate (wax/shatter)
  - Topically

*If answer = Smoking, ask next question Q4*

*If answer = Vaping, Edibles, Concentrate, or Topically, skip to Q14 (General Health Questions)*

4. In the past 30 days have you smoked a: (Check all that apply)
- Joint
  - Pipe
  - Bong
  - Blunt (a hollowed-out cigar filled with marijuana)
  - Spliff (a marijuana cigarette prepared with both marijuana and tobacco)

*If answer = Joint, Pipe, or Bong, ask Q5-Q7*

*If answer = Blunt and/or Spliff, ask Q8 and Q9*

5. On how many of the past 30 days did you smoke marijuana in a joint, pipe, or bong?  
 \_\_\_\_\_ Days
6. On those days, how many joints, pipes or bongs did you smoke?  
 \_\_\_\_\_ joints, pipes, or bongs per day
7. When you smoked marijuana using a joint, pipe, or bong in the past 30 days, did you ever mix tobacco in with the marijuana?  
 Yes  
 No
8. On how many of the past 30 days did you smoke blunts or spliffs?  
 \_\_\_\_\_ Days
9. On those days, how many blunts or spliffs did you smoke?  
 \_\_\_\_\_ Blunts or spliffs per day
10. Over the entire period you were smoking marijuana about how many years did you smoke marijuana on a daily or near daily basis? (ask if Q2 or Q3 = Smoking)  
 \_\_\_\_\_ years (enter zero if you didn't smoke on a daily or near daily basis)

*If answer = number  $\geq 1$ , ask Q11*

*If answer = 0, ask Q13*

11. During the [Q10] year(s) that you smoked on a daily or near daily basis in which form did you most often smoke marijuana? (if Q10 = number  $\geq 1$ )  
 Joints  
 Pipes  
 Bongs
12. During the [Q10] year(s) that you smoked [Q11] on a daily or near daily basis how many [Q11] did you smoke per day? (if Q10 = number  $\geq 1$ )  
 Enter # of [Q11]
13. Which category best describes the total number of times you've smoked marijuana over your lifetime? Please choose the option which best captures your use. (if Q10 = 0)  
 1-50  
 51-500  
 501-1000  
 More than 1000

General Health (Given to all individuals who receive this follow-up survey)

**Section Preface:** "The next questions will ask about your general health."

14. In general, how would you rate your overall health?  
 Excellent  
 Good  
 Fair  
 Poor

15. Compared to one year ago, how would you rate your overall health?

- Much better
- Somewhat better
- About the same
- Somewhat worse
- Much worse

#### Respiratory Questions

**Section Preface:** "The following questions ask about whether you have any chest trouble. Please answer as it applies to you."

16. I cough:

- Not at all
- Several days a week
- Most days a week
- Only with respiratory infections

17. I bring up phlegm (sputum):

- Not at all
- Several days a week
- Most days a week
- Only with respiratory infections

18. I have shortness of breath:

- Not at all
- Several days a week
- Most days a week
- Only with respiratory infections

19. I have attacks of wheezing:

- Not at all
- Several days a week
- Most days a week
- Only with respiratory infections

20. How many attacks of chest trouble did you have during the last year?

- None
- 1 or 2 attacks
- 3 or more attacks

#### Chronic Bronchitis Questions

21. In the past 2 years, have you had a period of cough with phlegm and sputum production lasting for at least 3 months?

- Yes
- No

*If answer = Yes, ask Q22.*

*If answer = No, ask Q23.*

22. In the past 2 years, have you had more than one such period?

- Yes
- No

Dyspnea Question

23. Please choose the one best response to describe your shortness of breath.

- "I only get breathless with strenuous exercise."
- "I get short of breath when hurrying on the level or walking up a slight hill."
- "I walk slower than people of the same age on the level because of breathlessness or have to stop for breath when walking at my own pace on the level."
- "I stop for breath after walking about 100 yards or after a few minutes on the level."
- "I am too breathless to leave the house" or "I am breathless when dressing."

Chronic Condition Question

24. Has a doctor, nurse, or other health professional ever told you that you had any of the following?  
For each, please mark Yes, No, or Not Sure/Don't Know.

| Condition                                                                                      | Yes | No | Not Sure/Don't Know |
|------------------------------------------------------------------------------------------------|-----|----|---------------------|
| High blood pressure (hypertension)                                                             |     |    |                     |
| High cholesterol                                                                               |     |    |                     |
| Heart attack (also called myocardial infarction)                                               |     |    |                     |
| Angina or coronary heart disease (also called coronary artery disease, CAD)                    |     |    |                     |
| Congestive heart failure (CHF)                                                                 |     |    |                     |
| Atrial fibrillation                                                                            |     |    |                     |
| Stroke                                                                                         |     |    |                     |
| Asthma                                                                                         |     |    |                     |
| Chronic obstructive pulmonary disease (COPD), emphysema, or chronic bronchitis                 |     |    |                     |
| Other                                                                                          |     |    |                     |
| Lung cancer                                                                                    |     |    |                     |
| Any other types of cancer (not including benign skin cancers)                                  |     |    |                     |
| A depressive disorder (including depression, major depression, dysthymia, or minor depression) |     |    |                     |
| Kidney disease (not including kidney stones, bladder infection, or incontinence)               |     |    |                     |
| Diabetes                                                                                       |     |    |                     |
| Some form of arthritis, rheumatoid arthritis, gout, lupus, or fibromyalgia                     |     |    |                     |

Marijuana Questions part 2 (given to individuals who have smoked in the past 30 days)

**Section Preface:** "We are now going to ask you a few more marijuana questions that focus more specifically on different types of use."

25. On how many days in the past 30 days did you smoke marijuana in any form (joint, pipe, bong, spliff, blunt)? Please choose the option which best captures your use.

- Every day
- Nearly every day
- Every other day
- Twice a week
- Once a week
- Twice a month
- Once a month

26. On average, on the days the you smoked marijuana in the past 30 days, how many times did you smoke each day? Please choose the option which best captures your use.

- Once
- Twice
- Three times
- Four times
- Five times
- Six time
- More than 6 times

27. In the last 30 days, how many days did you smoke a joint? Please choose the option which best captures your use. (if Q4 = Joint)

- Every day
- Nearly every day
- Every other day
- Twice a week
- Once a week
- Twice a month
- Once a month

28. On those days, how many joints did you smoke? (if Q4 = Joint)

- \_\_\_\_\_ joints

29. In the last 30 days, how many days did you smoke a pipe? Please choose the option which best captures your use. (if Q4 = Pipe)

- Every day
- Nearly every day
- Every other day
- Twice a week
- Once a week
- Twice a month
- Once a month

30. On those days, how many pipes did you smoke? (if Q4 = Pipe)

- \_\_\_\_\_ pipes

31. In the last 30 days, how many days did you smoke a bong? Please choose the option which best captures your use. (if Q4 = Bong)
- Every day
  - Nearly every day
  - Every other day
  - Twice a week
  - Once a week
  - Twice a month
  - Once a month
32. On those days, how many bongs did you smoke? (if Q4 = Bong)
- \_\_\_\_\_ bongs
33. In the last 30 days, how many days did you smoke a blunt? Please choose the option which best captures your use. (if Q4 = Blunt)
- Every day
  - Nearly every day
  - Every other day
  - Twice a week
  - Once a week
  - Twice a month
  - Once a month
34. On those days, how many blunts did you smoke? (if Q4 = Blunt)
- \_\_\_\_\_ blunts
35. In the last 30 days, how many days did you smoke a spliff? (if Q4 = Spliff)
- Every day
  - Nearly every day
  - Every other day
  - Twice a week
  - Once a week
  - Twice a month
  - Once a month
36. On those days, how many spliffs did you smoke? Please choose the option which best captures your use. (if Q4 = Spliff)
- \_\_\_\_\_ spliffs
37. Which of the following categories best captures the amount of marijuana you smoked over the past 30 days? Please choose the option which best captures your use.
- Less than an eighth of an ounce (which is less than 3.5 grams)
  - An eighth of an ounce (which is the same as 3.5 grams)
  - A quarter of an ounce (which is the same as 7 grams)
  - A half of an ounce (which is the same as 14 grams)
  - Three quarters of an ounce (which is the same as 21 grams)
  - An ounce (which is the same as 28 grams)
  - More than one ounce (greater than 28 grams)

**Survey End:** "Thank you for taking the time to complete our survey!"
