# Supplementary material for: National cross-sectional survey of US adults to assess the reliability of current and lifetime cannabis smoking
Source: PubMed Central journal article supplement — BMJ Open. 2024 Aug 31;14(8):e078245. doi: 10.1136/bmjopen-2023-078245 (PMC11367356; doi:10.1136/bmjopen-2023-078245), 2024-08-31
Supplement: bmjopen-14-8-s002.pdf [file bmjopen-14-8-s002.pdf]

## Weighting Methodology for NCIRE Recreational Marijuana

Wave 1 of this study was conducted in 2017 and wave 2 was conducted in 2020. Because some states have changed their legalization status in the intervening 3 years and because some respondents have moved over that period of time, we provide two sets of weights (2017 version and 2020 version). Both weights use current respondent demos with the exception of the state of residence - for 2017 version, the state reflects the state where the respondent lived in 2017. Our weighting process included the following steps:

### 2017 version:

Definition of Areas:

Region 1 - Legal Recreational: AK, CO, ME, MA, NV, OR, WA, DC

Region 2 - Legal Medical: AZ, AR, CA CT, DE, FL, HI, IL, LA, MD, MI, MN, MT, NH, NJ, NM, NY, ND, OH, PA, RI, VT, WV

Region 3 - Not Legal: AL, GA, ID, IN, IA, KS, KY, MS, MO, NE, NC, OK, SC, SD, TN, TX, UT, VA, WI, WY

Region 4 - Legal Medical: CA

In the first step, we carry over the weight from last wave as the starting weights and rake to the following geodemographic distributions of the 20 and over population using benchmarks secured from March 2019 CPS Supplement Data.

- Gender (Male, Female) by Age (20-29, 30-44, 45-59, 60+) by Areas (1=Region 1, 2= Region 2 - exclude CA, 3= Region 3 and 4=CA).
- Race/ethnicity (Whites, Black, Others, Hispanics, 2+ Races) by Areas (1=Region 1, 2=Region 2 - exclude CA, 3=Region 3 and 4=CA).
- 2017 Region (Northeast, Midwest, South, West) by 2017 Metropolitan Status (Metro, Non-Metro) by areas (1=Region 1, 2=Region 2 - exclude CA, 3=Region 3 and 4=CA).
- Education (Less than HS, HS, Some College, Bachelor or Higher) by Areas (1=Region 1, 2=Region 2 - exclude CA, 3=Region 3 and 4=CA).
- Income (Under \$25,000, \$25,000-\$49,999, \$50,000-\$74,999, \$75,000-\$99,999, \$100,000-\$149,999, \$150,000 and over') by Areas (1=Region 1, 2=Region 2 - exclude CA, 3=Region 3 and 4=CA).

The resulting interim weights are trimmed and scaled to the total number of respondents, and labeled as weight1\_2017. Then we re-scale the weights to get the 3 Regional sample weights (weight2a\_2017, weight2b\_2017, weight2c\_2017) and CA sample weights (weight3a\_2017).

Using the above weights (weight1\_2017) as starting weights, ratio adjustments are applied using 2019 CPS benchmarks for all 20 to 32-year-olds.

- Gender (Male, Female) by Age (20-21,22-23,24-25,26-27,28-29,30-32)
- Race/ethnicity (Whites, Black, Others, Hispanics, 2+ Races)
- Areas (Region 1, Region 2/Northeast - exclude CA, Region 2/Midwest - exclude CA, Region 2/South - exclude CA, Region 2/West - exclude CA, Region 3/Midwest, Region 3/South, Region 3/West, CA)
- 2017 Metropolitan Status (Metro, Non-Metro)
- Education (Less than HS, HS, Some College, Bachelor or Higher)

- Income (Under \$25,000, \$25,000-\$49,999, \$50,000-\$74,999, \$75,000-\$99,999, \$100,000-\$149,999, \$150,000 and over)

The resulting interim weights are trimmed, scaled back to the total number of respondents, and labeled as weight3b\_2017.

### **2020 version**

Definition of Areas:

Region 1 - Legal Recreational: AK, CO, IL, ME, MA, MI, NV, OR, VT, WA, DC

Region 2 - Legal Medical: AZ, AR, CT, DE, FL, HI, LA, MD, MN, MO, MT, NH, NJ, NM, NY, ND, OH, OK, PA, RI, UT, WV

Region 3 - Not Legal: AL, GA, ID, IN, IA, KS, KY, MS, NE, NC, SC, SD, TN, TX, VA, WI, WY

Region 4 - Legal Recreational: CA

For the 2020 weight version, we also carry over the weight from last wave as the starting weights and rake to the following geodemographic distributions of the 20 and over population using benchmarks secured from March 2019 CPS Supplement Data.

- Gender (Male, Female) by Age (20-29, 30-44, 45-59, 60+) by Areas (1=Region 1- exclude CA, 2=Region 2, 3=Region 3 and 4=CA).
- Race/ethnicity (Whites, Black, Others, Hispanics, 2+ Races) by Areas (1=Region 1- exclude CA, 2=Region 2, 3=Region 3 and 4=CA).
- Region (Northeast, Midwest, South, West) by Metropolitan Status (Metro, Non-Metro) by Areas (1=Region 1- exclude CA, 2=Region 2, 3=Region 3 and 4=CA).
- Education (Less than HS, HS, Some College, Bachelor or Higher) by Areas (1=Region 1- exclude CA, 2=Region 2, 3=Region 3 and 4=CA).
- Income (Under \$25,000, \$25,000-\$49,999, \$50,000-\$74,999, \$75,000-\$99,999, \$100,000-\$149,999, \$150,000 and over') by Areas (1=Region 1- exclude CA, 2=Region 2, 3=Region 3 and 4=CA).

The resulting interim weights are trimmed, scaled back to the total number of respondents, and labeled as weight1\_2020. Once we have the weights for total sample (weight1\_2020), we re-scale the weights to get the 3 Regional sample weights (weight2a\_2020, weight2b\_2020, weight2c\_2020) and CA sample weights (weight3a\_2020).

20-32 US Population Benchmarks  
Source: March 2019 CPS Supplement Data

| Age by Gender   | Frequency | Percent |
|-----------------|-----------|---------|
| 20,21 Male      | 4241795   | 7.34    |
| 20,21 Female    | 4082444   | 7.06    |
| 22,23 Male      | 4210614   | 7.28    |
| 22,23 Female    | 4268514   | 7.38    |
| 24,25 Male      | 4554096   | 7.88    |
| 24,25 Female    | 4335392   | 7.5     |
| 26,27 Male      | 4664497   | 8.07    |
| 26,27 Female    | 4623628   | 8       |
| 28,29 Male      | 4835498   | 8.37    |
| 28,29 Female    | 4704980   | 8.14    |
| 30,31,32 Male   | 6722717   | 11.63   |
| 30,31,32 Female | 6557309   | 11.34   |

| Ethnicity             | Frequency | Percent |
|-----------------------|-----------|---------|
| White, Non-Hispanic   | 31410408  | 54.34   |
| Black, Non-Hispanic   | 7965045   | 13.78   |
| Other, Non-Hispanic   | 4691113   | 8.12    |
| Hispanic              | 12465895  | 21.57   |
| 2+ Race, Non-Hispanic | 1269025   | 2.2     |

| Census Region 9                    | Frequency | Percent |
|------------------------------------|-----------|---------|
| region 1                           | 5552023   | 9.61    |
| region 2/Northeast -<br>exclude CA | 8275041   | 14.32   |
| region 2/Midwest -<br>exclude CA   | 6954207   | 12.03   |
| region 2/South - exclude<br>CA     | 6193464   | 10.72   |
| region 2/West - exclude<br>CA      | 1993652   | 3.45    |
| region 3/Midwest                   | 4724489   | 8.17    |
| region 3/South                     | 15633579  | 27.05   |
| region 3/West                      | 1089331   | 1.88    |
| CA                                 | 7385699   | 12.78   |

| <b>Metro Status</b> | <b>Frequency</b> | <b>Percent</b> |
|---------------------|------------------|----------------|
| <b>Non-Metro</b>    | 6596520          | 11.41          |
| <b>Metro</b>        | 51204966         | 88.59          |

| <b>Education Level</b>    | <b>Frequency</b> | <b>Percent</b> |
|---------------------------|------------------|----------------|
| <b>Less than HS</b>       | 3936041          | 6.81           |
| <b>HS</b>                 | 15990198         | 27.66          |
| <b>Some college</b>       | 19817003         | 34.28          |
| <b>Bachelor or higher</b> | 18058244         | 31.24          |

| <b>Household Income</b>    | <b>Frequency</b> | <b>Percent</b> |
|----------------------------|------------------|----------------|
| <b>Under \$25,000</b>      | 6285783          | 10.87          |
| <b>\$25,000-\$49,999</b>   | 10587229         | 18.32          |
| <b>\$50,000-\$74,999</b>   | 11141380         | 19.28          |
| <b>\$75,000-\$99,999</b>   | 8881916          | 15.37          |
| <b>\$100,000-\$149,999</b> | 10494991         | 18.16          |
| <b>\$150,000 and over</b>  | 10410186         | 18.01          |

| <b>Age</b> | <b>Frequency</b> | <b>Percent</b> |
|------------|------------------|----------------|
| <b>20</b>  | 4019817          | 6.95           |
| <b>21</b>  | 4304422          | 7.45           |
| <b>22</b>  | 4169814          | 7.21           |
| <b>23</b>  | 4309315          | 7.46           |
| <b>24</b>  | 4449270          | 7.7            |
| <b>25</b>  | 4440219          | 7.68           |
| <b>26</b>  | 4641556          | 8.03           |
| <b>27</b>  | 4646568          | 8.04           |
| <b>28</b>  | 4722035          | 8.17           |
| <b>29</b>  | 4818443          | 8.34           |
| <b>30</b>  | 4380548          | 7.58           |
| <b>31</b>  | 4524451          | 7.83           |
| <b>32</b>  | 4375028          | 7.57           |
