# Supplementary material for: National cross-sectional survey of US adults to assess the reliability of current and lifetime cannabis smoking
Source: PubMed Central journal article supplement — BMJ Open. 2024 Aug 31;14(8):e078245. doi: 10.1136/bmjopen-2023-078245 (PMC11367356; doi:10.1136/bmjopen-2023-078245), 2024-08-31
Supplement: bmjopen-14-8-s003.pdf [file bmjopen-14-8-s003.pdf]

**Figure A1. Figure and Table Demonstrating Sample Sizes Used in Analyses**

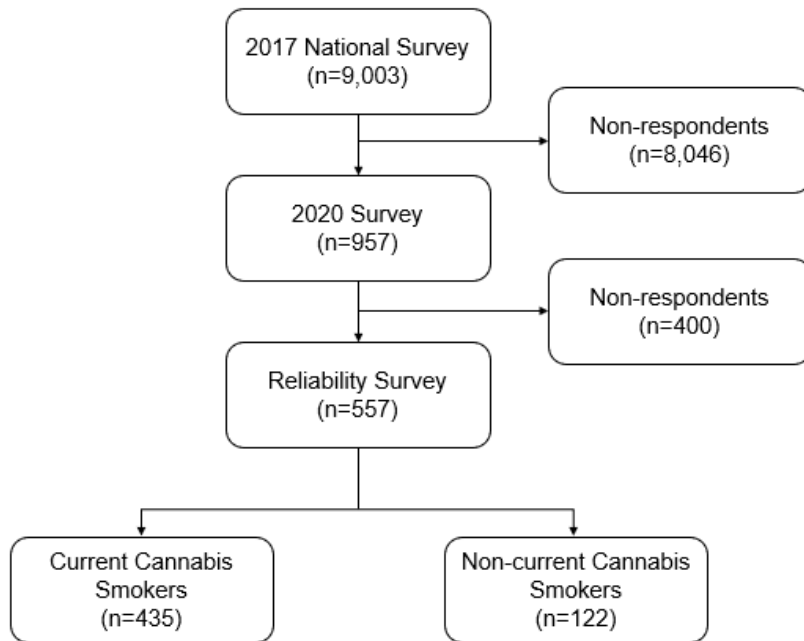

| Question                                                                                                                                       | Number of Participants who Received Question | Number of Participants who Answered Question |
|------------------------------------------------------------------------------------------------------------------------------------------------|----------------------------------------------|----------------------------------------------|
| Current Cannabis Smoking                                                                                                                       |                                              |                                              |
| On how many of the past 30 days did you smoke marijuana in a joint, pipe, or bong?                                                             | 435                                          | 329                                          |
| On those days, how many joints, pipes, or bongs did you smoke per day?                                                                         | 435                                          | 328                                          |
| Lifetime Cannabis Smoking                                                                                                                      |                                              |                                              |
| Over the entire period you were smoking marijuana, about how many years did you smoke marijuana on a daily or near daily basis?                | 557                                          | 528                                          |
| During the years that you smoked on a daily or near daily basis, in which form did you most often smoke marijuana?                             | 557                                          | 330                                          |
| During the ___ years that you smoked [joints/pipes/bongs] on a daily or near daily basis, how many [joints/pipes/bongs] did you smoke per day? | 557                                          | 329                                          |
| Which category best describes the total number of times you've smoked marijuana over your lifetime?                                            | 557                                          | 137                                          |

\*To be included for analysis, participants had to answer the question in both the 2020 survey and the reliability survey.
